# Supplementary material for: Whole-genome scanning reveals environmental selection mechanisms that shape diversity in populations of the epipelagic diatom Chaetoceros
Source: PLoS Biol. 2022 Nov 28;20(11):e3001893. doi: 10.1371/journal.pbio.3001893 (PMC9731442; doi:10.1371/journal.pbio.3001893)
Supplement: S7 Data — (A) Euclidean distances of silicate concentrations for ARC_116 Mantel test. (B) Euclidean distances of phosphate concentrations for ARC_116 Mantel test. (C) Euclidean distances using geographical coordinates for ARC_116 Mantel test. (D) Euclidean distances of iron concentrations for ARC_217 Mantel test. (E) Euclidean distances of phosphate concentrations for SOC_37 Mantel test. (F) Euclidean distances of temperature for SOC_37 Mantel test. (G) Parameters of ARC_116 variance partitioning analysis. (H) Parameters of ARC_217 variance partitioning analysis. (I) Parameters of SOC_37 variance partitioning analysis. (XLSX) [file pbio.3001893.s043.xlsx]

## Sheet: S7A
S7A Data. Euclidean distances of silicate concentrations for ARC_116 Mantel test.
TARA_175S	TARA_188D	TARA_188S	TARA_189D	TARA_189S	TARA_193S	TARA_194D	TARA_194S	TARA_201S
0	25.3623	25.3622	50.1154	50.1154	108.828	234.979	234.979	152.196
25.3623	0	0.001	24.7586	24.7586	83.4861	260.29	260.29	177.498
25.3622	0.001	0	24.7586	24.7586	83.4862	260.29	260.29	177.499
50.1154	24.7586	24.7586	0	0.001	58.8259	285.039	285.039	202.245
50.1154	24.7586	24.7586	0.001	0	58.826	285.039	285.039	202.245
108.828	83.4861	83.4862	58.8259	58.826	0	343.426	343.426	260.65
234.979	260.29	260.29	285.039	285.039	343.426	0	0.001	82.795
234.979	260.29	260.29	285.039	285.039	343.426	0.001	0	82.795
152.196	177.498	177.499	202.245	202.245	260.65	82.795	82.795	0

## Sheet: S7B
S7B Data. Euclidean distances of phosphate concentrations for ARC_116 Mantel test.
TARA_175S	TARA_188D	TARA_188S	TARA_189D	TARA_189S	TARA_193S	TARA_194D	TARA_194S	TARA_201S
0	0.243958	0.152393	0.063634	0.063634	1.55134	0.80256	0.298019	0.462611
0.243958	0	0.091565	0.307592	0.307592	1.30739	0.558602	0.054061	0.218653
0.152393	0.091565	0	0.216027	0.216027	1.39895	0.650167	0.145626	0.310218
0.063634	0.307592	0.216027	0	0	1.61498	0.866194	0.361653	0.526245
0.063634	0.307592	0.216027	0	0	1.61498	0.866194	0.361653	0.526245
1.55134	1.30739	1.39895	1.61498	1.61498	0	0.748783	1.25332	1.08873
0.80256	0.558602	0.650167	0.866194	0.866194	0.748783	0	0.504541	0.339949
0.298019	0.054061	0.145626	0.361653	0.361653	1.25332	0.504541	0	0.164592
0.462611	0.218653	0.310218	0.526245	0.526245	1.08873	0.339949	0.164592	0

## Sheet: S7C
S7C Data. Euclidean distances using geographical coordinates for ARC_116 Mantel test.
TARA_175S	TARA_188D	TARA_188S	TARA_189D	TARA_189S	TARA_193S	TARA_194D	TARA_194S	TARA_201S
0	0.328729	0.057414	0.523062	0.523062	29.6264	5.04378	0.901199	1.53898
0.328729	0	0.386143	0.851791	0.851791	29.2977	4.71505	0.57247	1.21025
0.057414	0.386143	0	0.465648	0.465648	29.6839	5.10119	0.958613	1.5964
0.523062	0.851791	0.465648	0	0	30.1495	5.56684	1.42426	2.06204
0.523062	0.851791	0.465648	0	0	30.1495	5.56684	1.42426	2.06204
29.6264	29.2977	29.6839	30.1495	30.1495	0	24.5827	28.7252	28.0875
5.04378	4.71505	5.10119	5.56684	5.56684	24.5827	0	4.14258	3.5048
0.901199	0.57247	0.958613	1.42426	1.42426	28.7252	4.14258	0	0.637784
1.53898	1.21025	1.5964	2.06204	2.06204	28.0875	3.5048	0.637784	0

## Sheet: S7D
S7D Data. Euclidean distances of iron concentrations for ARC_217 Mantel test.
TARA_175S	TARA_188D	TARA_188S	TARA_189D	TARA_189S	TARA_193S	TARA_194D	TARA_194S	TARA_201S
0	0.243958	0.152393	0.063634	0.063634	1.55134	0.80256	0.298019	0.462611
0.243958	0	0.091565	0.307592	0.307592	1.30739	0.558602	0.054061	0.218653
0.152393	0.091565	0	0.216027	0.216027	1.39895	0.650167	0.145626	0.310218
0.063634	0.307592	0.216027	0	0	1.61498	0.866194	0.361653	0.526245
0.063634	0.307592	0.216027	0	0	1.61498	0.866194	0.361653	0.526245
1.55134	1.30739	1.39895	1.61498	1.61498	0	0.748783	1.25332	1.08873
0.80256	0.558602	0.650167	0.866194	0.866194	0.748783	0	0.504541	0.339949
0.298019	0.054061	0.145626	0.361653	0.361653	1.25332	0.504541	0	0.164592
0.462611	0.218653	0.310218	0.526245	0.526245	1.08873	0.339949	0.164592	0

## Sheet: S7E
S7E Data. Euclidean distances of phosphate concentrations for SOC_37 Mantel test.
TARA_173D	TARA_173S	TARA_180D	TARA_194D	TARA_201D
0	0.152194	0.273706	0.657129	0.435235
0.152194	0	0.4259	0.809323	0.587429
0.273706	0.4259	0	0.383423	0.161529
0.657129	0.809323	0.383423	0	0.221894
0.435235	0.587429	0.161529	0.221894	0

## Sheet: S7F
S7F Data. Euclidean distances of temperature for SOC_37 Mantel test.
TARA_175S	TARA_188D	TARA_188S	TARA_189D	TARA_189S	TARA_193S	TARA_194D	TARA_194S	TARA_201S
0	0.243958	0.152393	0.063634	0.063634	1.55134	0.80256	0.298019	0.462611
0.243958	0	0.091565	0.307592	0.307592	1.30739	0.558602	0.054061	0.218653
0.152393	0.091565	0	0.216027	0.216027	1.39895	0.650167	0.145626	0.310218
0.063634	0.307592	0.216027	0	0	1.61498	0.866194	0.361653	0.526245
0.063634	0.307592	0.216027	0	0	1.61498	0.866194	0.361653	0.526245
1.55134	1.30739	1.39895	1.61498	1.61498	0	0.748783	1.25332	1.08873
0.80256	0.558602	0.650167	0.866194	0.866194	0.748783	0	0.504541	0.339949
0.298019	0.054061	0.145626	0.361653	0.361653	1.25332	0.504541	0	0.164592
0.462611	0.218653	0.310218	0.526245	0.526245	1.08873	0.339949	0.164592	0

## Sheet: S7G
S7G Data. Parameters of ARC_116 variance partitioning analysis.
variances	percentage
0.0262027	1
5.7609e-05	0.00219859
4.63434e-05	0.00176865
5.45823e-05	0.00208308
0.0129777	0.495282
0.00394058	0.150388
0.00179846	0.0686364
0.00259256	0.0989425
0.000867004	0.0330883
0.00179693	0.0685779
0.0020709	0.079034

## Sheet: S7H
S7H Data. Parameters of ARC_217 variance partitioning analysis.
variances	percentage
0.00190995	1
7.60448e-06	0.00398151
1.52509e-11	7.98497e-09
0.000235094	0.123089
0.000160384	0.0839726
1.46177e-10	7.65345e-08
1.59043e-08	8.32706e-06
5.48558e-08	2.8721e-05
0.00146113	0.765009
7.56594e-11	3.96132e-08
4.56673e-05	0.0239102

## Sheet: S7I
S7I Data. Parameters of SOC_37 variance partitioning analysis.
variances	percentage
0.000974897	1
3.48379e-05	0.035735
0.000310037	0.31802
2.32652e-05	0.0238643
1.37072e-06	0.00140602
0.000169036	0.173389
5.70134e-05	0.0584815
2.67463e-07	0.000274349
2.84541e-05	0.0291868
1.3897e-08	1.42549e-05
0.000350602	0.359629
